# Supplementary material for: Effects of Chinese Medicine Tong xinluo on Diabetic Nephropathy via Inhibiting TGF‐β1‐Induced Epithelial‐to‐Mesenchymal Transition
Source: Hindawi journal article supplement (doi:10.1155/2014/123497), 2014-01-01
Supplement: f1 [file 123497.f1.pdf]

## Formulation of Tong xinluo

| Ingredient                                                              | Components                        | %    |
|-------------------------------------------------------------------------|-----------------------------------|------|
| <i>Panax ginseng</i> C. A. Mey. extract                                 | Root and rhizome                  | 1.7  |
| <i>Paeonia lactiflora</i> Pall. extract                                 | Root                              | 1.6  |
| <i>Ziziphus jujuba</i> Mill. Var. <i>spimosa</i><br>(Bunge) extract     | Seed                              | 1.2  |
| <i>Santalum album</i> . extract                                         | Heartwood of stem                 | 0.4  |
| <i>Dalbergia odorifera</i> extract                                      | Heartwood of stem and root        | 4.0  |
| <i>Steleophaga plancyi</i> (Boleny) Wingless<br>cockroach (beetle)      | Female dried body                 | 18.1 |
| <i>Scolopendra subspinipes mutilans</i> L.<br>Koch red-headed centipede | Dried body                        | 3.6  |
| <i>Hirudo nipponica</i> Whitman leech                                   | Dried body                        | 27.3 |
| <i>Cryptotympana pustulata</i> Fabricius<br>cicada                      | Skin                              | 18.1 |
| <i>Buthus martensii</i> Karsch scorpion                                 | Dried body                        | 18.1 |
| <i>Boswellia carteri</i>                                                | Resin                             | 6.0  |
| <i>Borneolum syntheticum</i>                                            | C <sub>10</sub> H <sub>18</sub> O | 3.6  |

## Result of high performance liquid chromatography (HPLC)

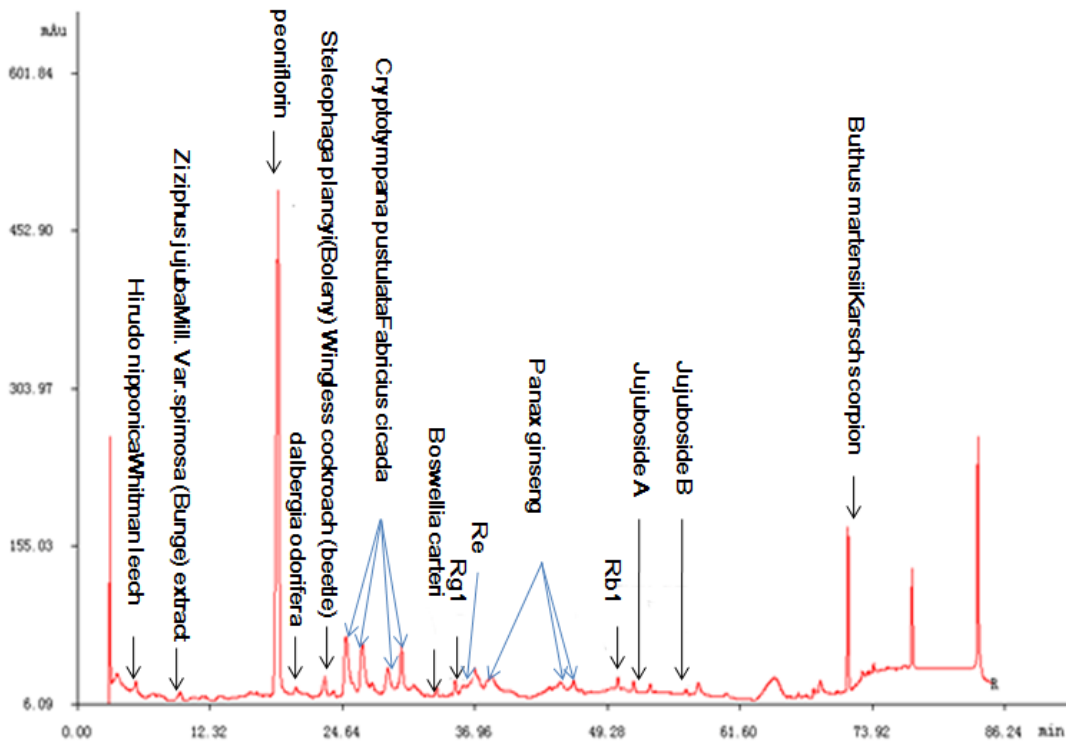

High performance liquid chromatography (HPLC) of Tongxinluo
